# Supplementary material for: Maximizing Ozone Signals Among Chemical, Meteorological, and Climatological Variability
Source: Copernicus journal article supplement (doi:10.5194/acp-2017-954), 2017-11-28
Supplement: Supplementary file 1 [file acp-2017-954-supplement.pdf]

## Supplemental Material

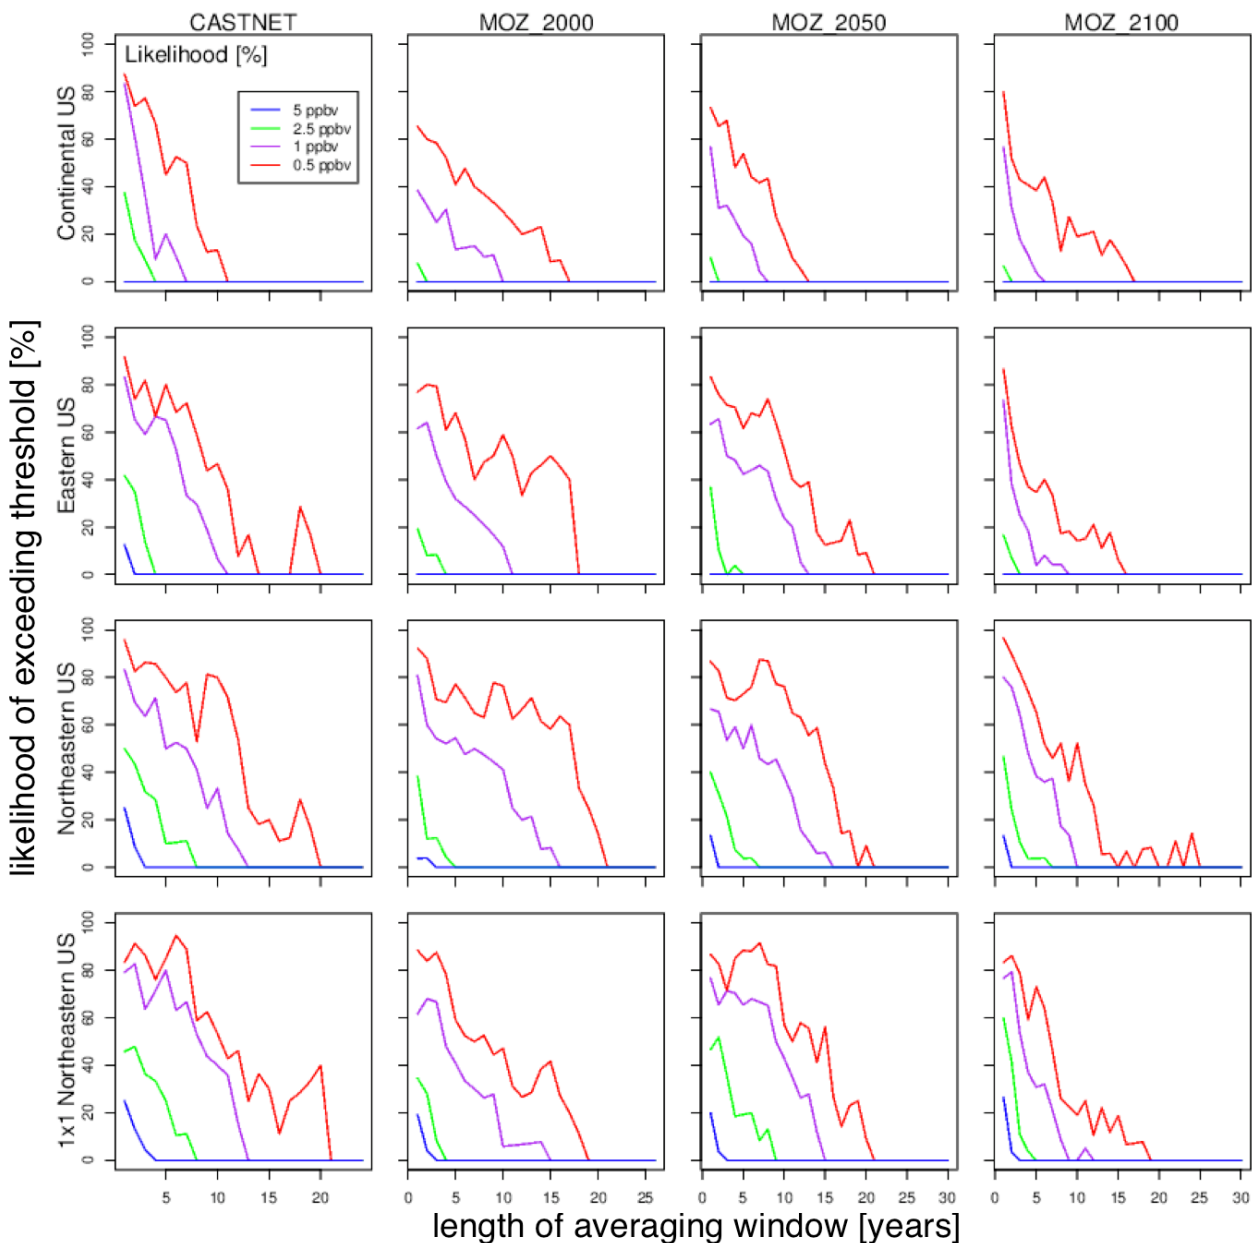

**Supplemental Figure S1:** The likelihood (percent, vertical axis) that an estimation of the mean ozone value for a given length of temporal averaging window (years, horizontal axis) is farther away from the long-term mean value than a given threshold: 5 ppbv (blue), 2.5 ppbv (purple), 1 ppbv (green), and 0.5 ppbv (blue). Individual columns represent the four datasets used in this study: CASTNET, present-day MOZART, and the two future MOZART simulations (2050, 2100). Individual rows are spatially averaging over the telescoping regions seen in Figure 1. Supplemental Figure S2 plots similar results for the Southeastern and Midwestern US.

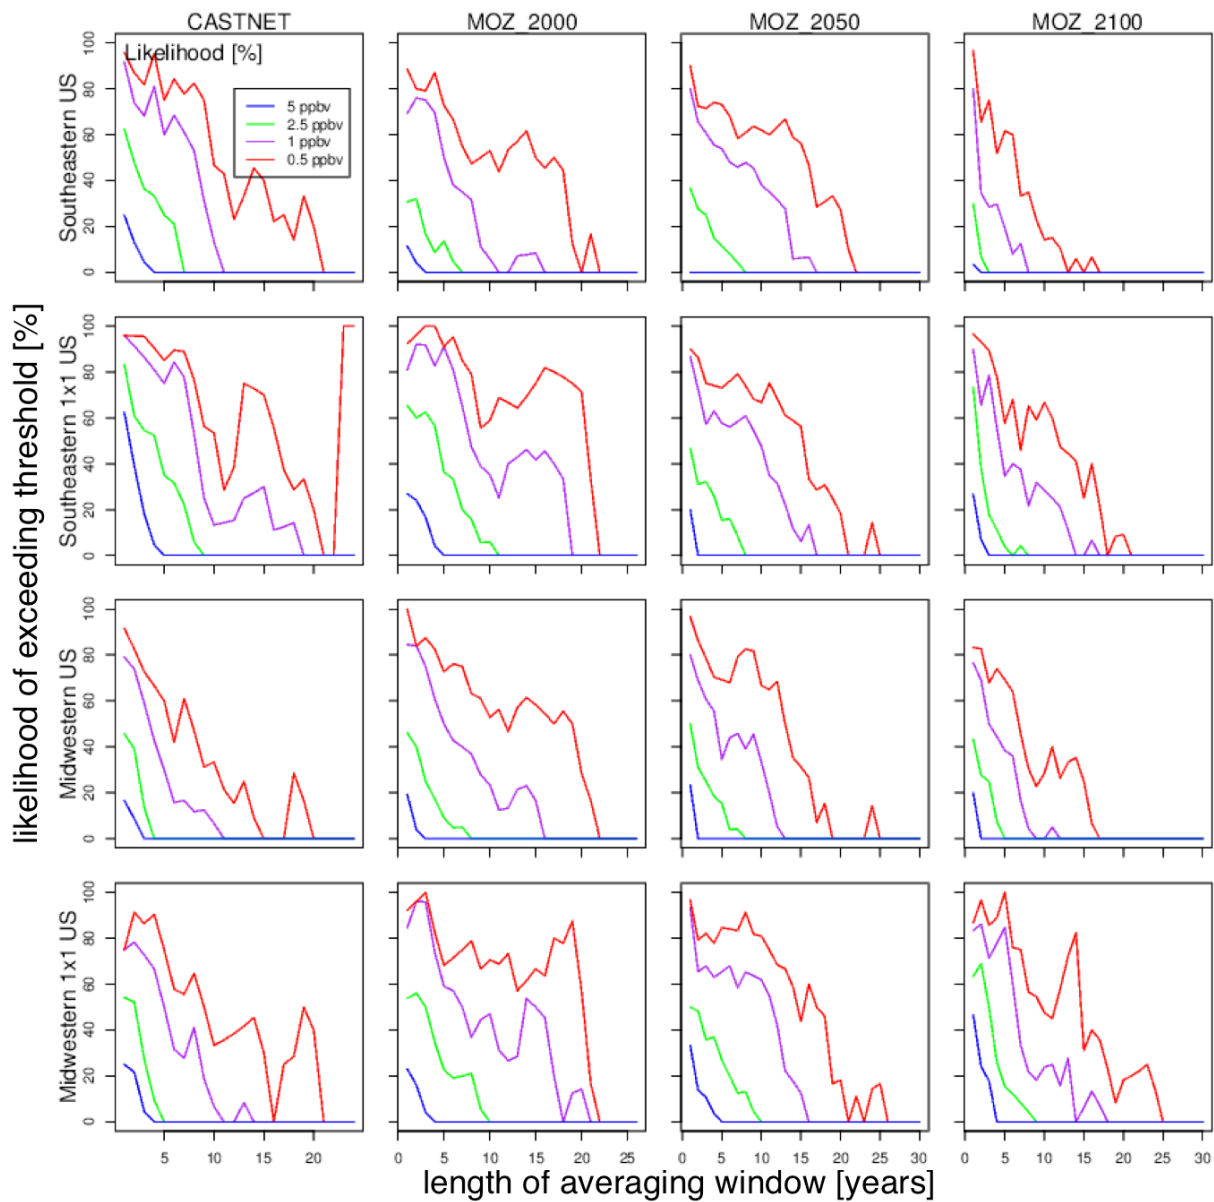

**Supplemental Figure S2 (as in Figure S1, but for the Southeastern and Midwestern US)**

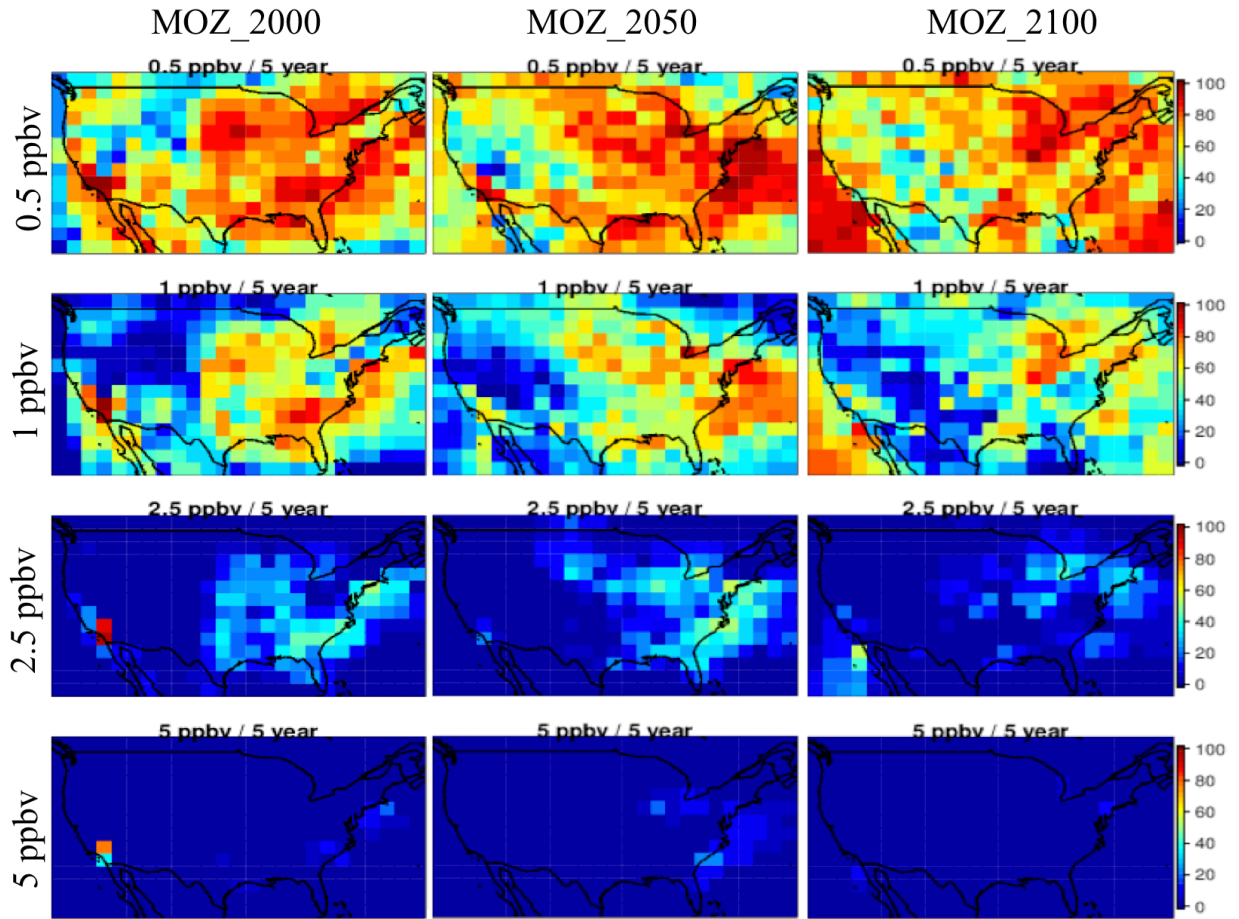

Figure S3: As in Figure 5, but only the second column, for present-day MOZART, future MOZART 2050, and future MOZART 2100.

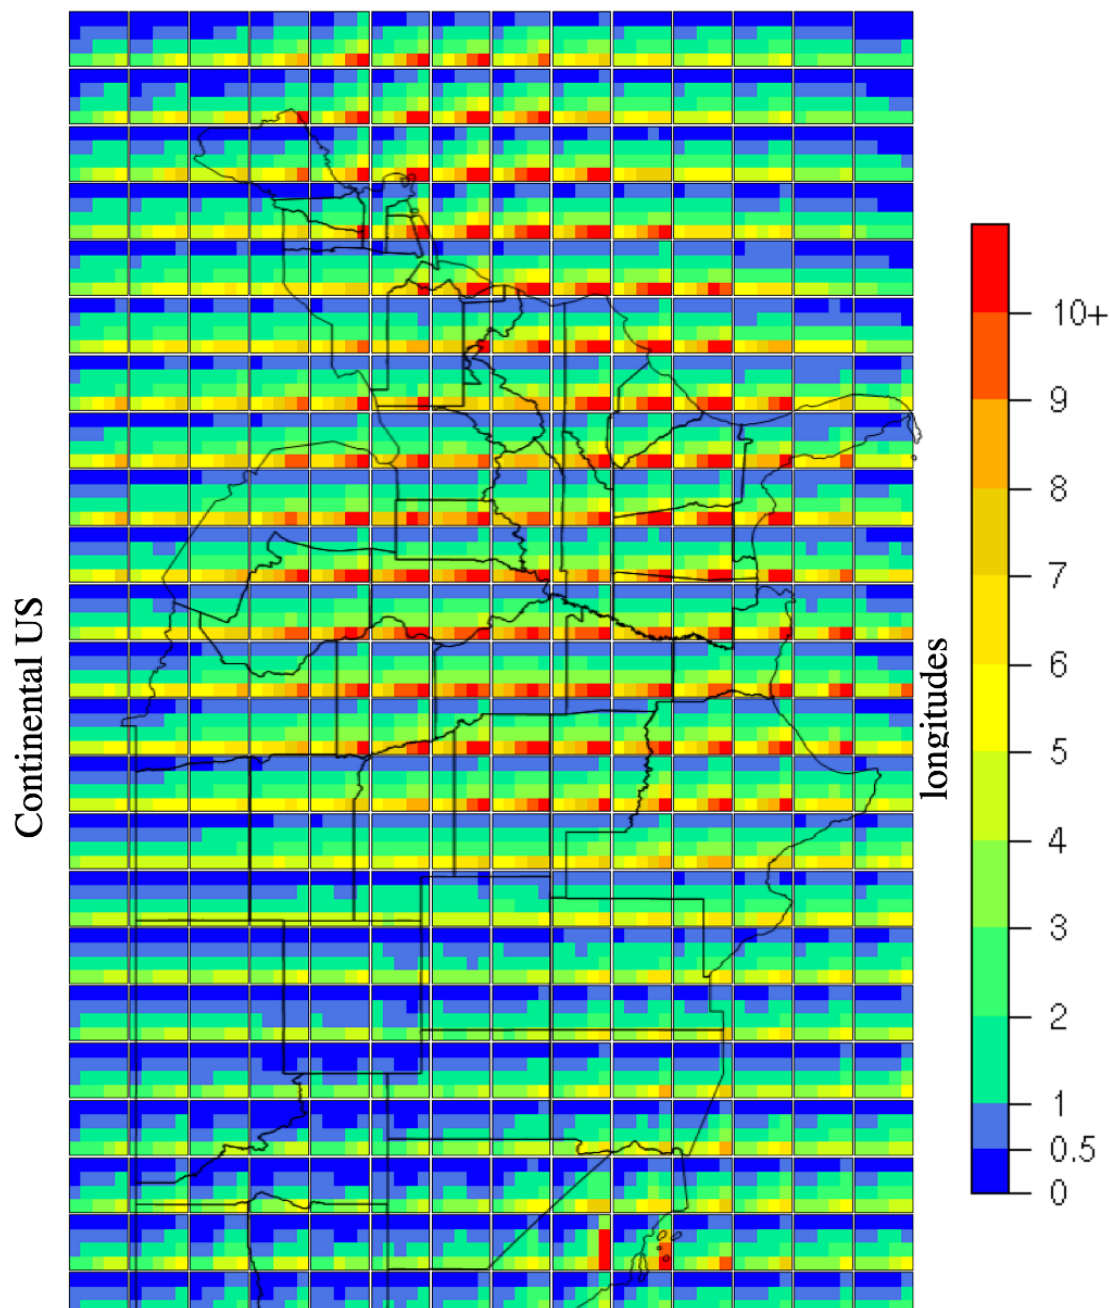

Supplemental Figure S4: As in Figure 8, plotting maximum potential calculated DM8H O<sub>3</sub> anomaly [ppbv] from the long-term (1990 – 2014) mean, but for every grid cell in the Continental US.

|                     |                    |      | CASTNET | MOZ_2000 | MOZ_2050 | MOZ_2100 |
|---------------------|--------------------|------|---------|----------|----------|----------|
| Southeastern US     | Mean               | ppbv | 52.8    | 60.2     | 56.2     | 56.5     |
|                     | Standard Deviation | ppbv | 7.39    | 9.22     | 8.14     | 8.56     |
|                     | Variability        | %    | 14%     | 15%      | 14%      | 15%      |
|                     | Bias               | ppbv |         | 7.39     |          |          |
| 1x1 Southeastern US | Mean               | ppbv | -       | 83.4     | 78.0     | 82.4     |
|                     | Standard Deviation | ppbv | -       | 19.1     | 18.9     | 20.8     |
|                     | Variability        | %    | -       | 23%      | 24%      | 25%      |
|                     | Bias               | ppbv |         | -        |          |          |
| Midwestern US       | Mean               | ppbv | 53.4    | 71.0     | 74.4     | 79.0     |
|                     | Standard Deviation | ppbv | 6.81    | 11.0     | 12.1     | 13.5     |
|                     | Variability        | %    | 13%     | 16%      | 16%      | 17%      |
|                     | Bias               | ppbv |         | 17.6     |          |          |
| 1x1 Midwestern US   | Mean               | ppbv | -       | 84.6     | 98.2     | 109      |
|                     | Standard Deviation | ppbv | -       | 16.2     | 22.9     | 26.1     |
|                     | Variability        | %    | -       | 19%      | 23%      | 24%      |
|                     | Bias               | ppbv |         | -        |          |          |

**Supplemental Table S1: Statistical Summary of the CASTNET observations and the three CAM-chem simulations for the Southeastern and Midwestern US. Variability is defined as the standard deviation divided by the mean value (in percent). Biases are only included for the present-day CAM-chem simulation compared to the CASTNET data. Similar tables for the other regions in this study are included in the Supplemental Material. Note that there were no CASTNET sites at the 1x1 grid cell regions.**

| Ozone Threshold |       | Length of Averaging Window |          |          |          |          |          |          |          |          |          |          |          | % Likelihood |   |       |
|-----------------|-------|----------------------------|----------|----------|----------|----------|----------|----------|----------|----------|----------|----------|----------|--------------|---|-------|
|                 |       | 5 years                    |          |          |          | 10 years |          |          |          | 15 years |          |          |          |              |   |       |
|                 |       | CNT_2000                   | MOZ_2000 | FGM_2050 | FGM_2100 | CNT_2000 | MOZ_2000 | FGM_2050 | FGM_2100 | CNT_2000 | MOZ_2000 | FGM_2050 | FGM_2100 |              |   |       |
| 2.5 ppbv        | CUS   | 0                          | 0        | 0        | 0        | 0        | 0        | 0        | 0        | 0        | 0        | 0        | 0        | 0            | 0 | 0     |
|                 | EUS   | 0                          | 0        | 0        | 0        | 0        | 0        | 0        | 0        | 0        | 0        | 0        | 0        | 0            | 0 | 1-10  |
|                 | NEUS  | 0                          | 0        | 3.8      | 3.8      | 0        | 0        | 0        | 0        | 0        | 0        | 0        | 0        | 0            | 0 | 11-20 |
|                 | NE1x1 | 10                         | 0        | 19       | 0        | 0        | 0        | 0        | 0        | 0        | 0        | 0        | 0        | 0            | 0 | 21-30 |
| 1.0 ppbv        | CUS   | 20                         | 14       | 19       | 3.8      | 0        | 0        | 0        | 0        | 0        | 0        | 0        | 0        | 0            | 0 | 31-40 |
|                 | EUS   | 25                         | 32       | 42       | 3.8      | 0        | 12       | 24       | 0        | 0        | 0        | 0        | 0        | 0            | 0 | 41-50 |
|                 | NEUS  | 30                         | 55       | 50       | 38       | 0        | 41       | 38       | 0        | 0        | 8.3      | 6.3      | 0        | 0            | 0 | 51-60 |
|                 | NE1x1 | 55                         | 41       | 65       | 31       | 13       | 5.9      | 43       | 0        | 10       | 0        | 0        | 0        | 0            | 0 | 61-70 |
| 0.5 ppbv        | CUS   | 35                         | 41       | 54       | 38       | 6.7      | 29       | 19       | 19       | 0        | 8.3      | 0        | 13       | 0            | 0 | 71-80 |
|                 | EUS   | 65                         | 68       | 62       | 35       | 13       | 59       | 52       | 14       | 0        | 50       | 13       | 6        | 0            | 0 | 81-90 |
|                 | NEUS  | 65                         | 77       | 73       | 65       | 33       | 76       | 76       | 52       | 0        | 58       | 44       | 0        | 0            | 0 |       |
|                 | NE1x1 | 70                         | 59       | 88       | 73       | 67       | 47       | 57       | 19       | 30       | 42       | 56       | 19       | 0            | 0 |       |

**Table S2: Summary of the likelihood (%) of the ozone variability exceeding a given threshold (2.5, 1.0, 0.5 ppbv, rows) away from the long-term mean for a given an averaging window length (5, 10, 15 years, columns). We excluded the 5 ppbv threshold and the 1-year and 20-year averaging windows as they have very high or very low likelihoods, respectfully. Within each block, the Percentage Likelihood is further subdivided into the telescoping regions (CUS, EUS, NEUS, NE1x1, sub-rows) and the DM8H O3 dataset (CASTNET, MOZ\_2000, MOZ\_2050, MOZ\_2100, sub-columns).**
